# Supplementary material for: New Synthesis of Gold‐ and Silver‐Based Nano‐Tetracycline Composites
Source: PubMed Central journal article supplement — ChemistryOpen. 2016 Jun 3;5(3):206–12. doi: 10.1002/open.201600016 (PMC5130297; doi:10.1002/open.201600016), 2016-06-03
Supplement: OPEN-5-206-s001.pdf [file OPEN-5-206-s001.pdf]

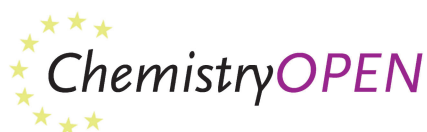

## Supporting Information

© 2016 The Authors. Published by Wiley-VCH Verlag GmbH & Co. KGaA, Weinheim

### **New Synthesis of Gold- and Silver-Based Nano-Tetracycline Composites**

Jamila Djafari,<sup>[a, b]</sup> Catarina Marinho,<sup>[c, d, e]</sup> Tiago Santos,<sup>[c, d, e]</sup> Gilberto Igrejas,<sup>[c, e]</sup> Carmen Torres,<sup>[f]</sup> José Luis Capelo,<sup>[a, b]</sup> Patricia Poeta,<sup>[d, e]</sup> Carlos Lodeiro,<sup>\*[a, b]</sup> and Javier Fernández-Lodeiro<sup>\*[a, b]</sup>

open\_201600016\_sm\_miscellaneous\_information.pdf

## Supporting Information

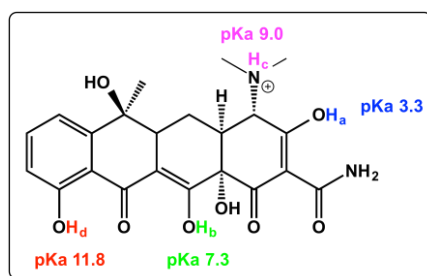

**Figure S1.** Structure of Tetracycline and its deprotonation sites with corresponding pKa values.

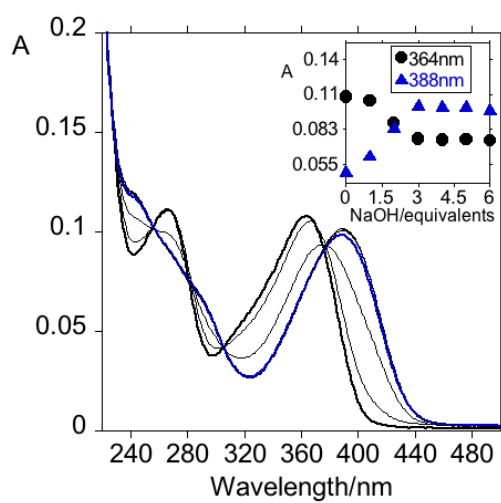

**Figure S2.** UV/Vis absorption spectra of titration of tetracycline with aqueous solution of NaOH. ([Tetracycline]= $1 \cdot 10^{-5}$  M in DMSO).

## Cation metal sensing applications

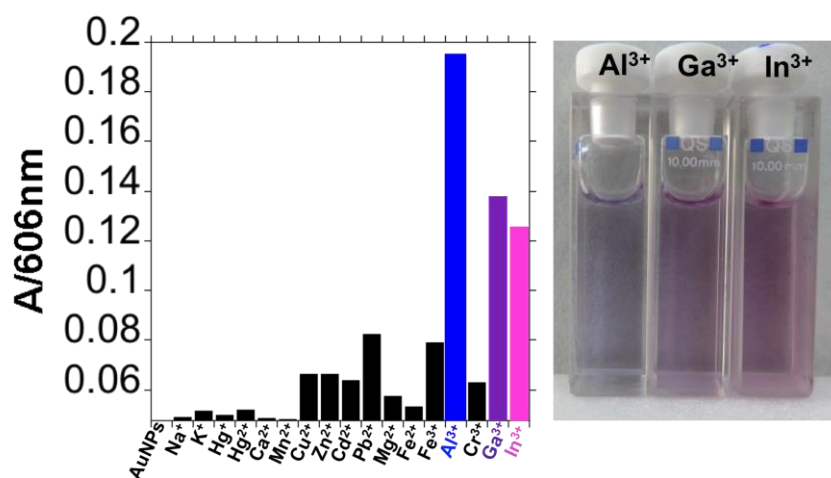

**Figure S3:** Bar diagram showing the intensity of LSRP band at 606 nm for addition of 500 nM of Na<sup>+</sup>, K<sup>+</sup>, Hg<sup>2+</sup>, Mg<sup>2+</sup>, Ca<sup>2+</sup>, Mn<sup>2+</sup>, Cu<sup>2+</sup>, Zn<sup>2+</sup>, Cd<sup>2+</sup>, Hg<sup>2+</sup>, Pb<sup>2+</sup>, Cr<sup>3+</sup>, Fe<sup>2+</sup>, Fe<sup>3+</sup>, Al<sup>3+</sup>, Ga<sup>3+</sup>, In<sup>3+</sup> and colour solution with addition of Al<sup>3+</sup>, Ga<sup>3+</sup> and In<sup>3+</sup>.

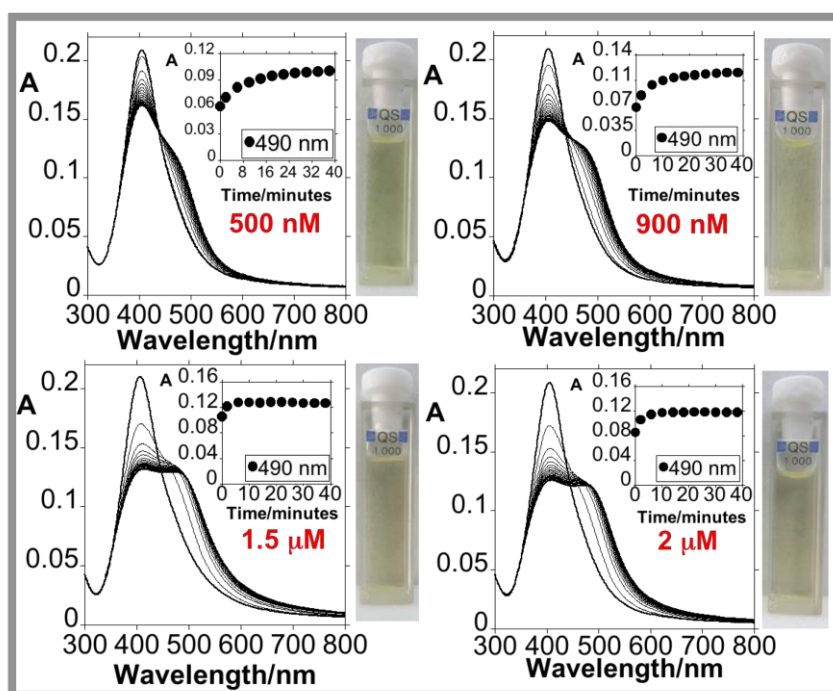

**Figure S4.** Spectrophotometric titration of AgNPs@TC with the addition of increasing amounts of  $\text{Al}(\text{NO}_3)_3$  and naked eye detection.

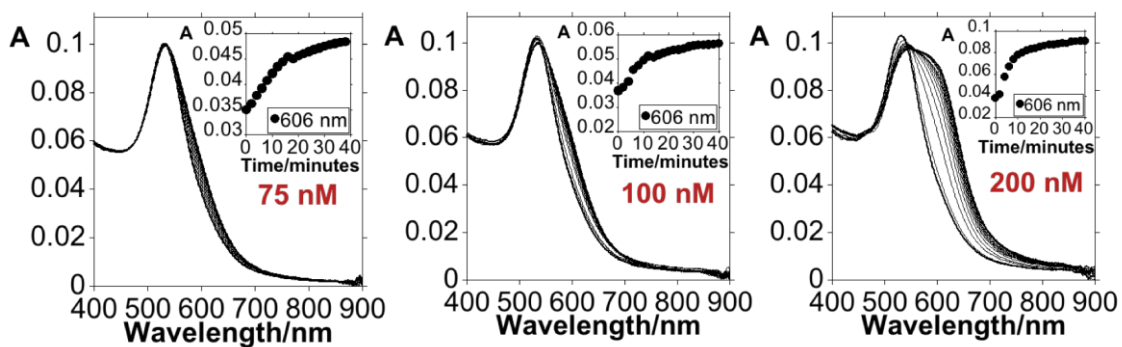

**Figure S5.** Spectrophotometric titration of AuNPs@TC with addition of different fixed quantities of  $\text{Al}(\text{III})$  with  $A=0.1$ .

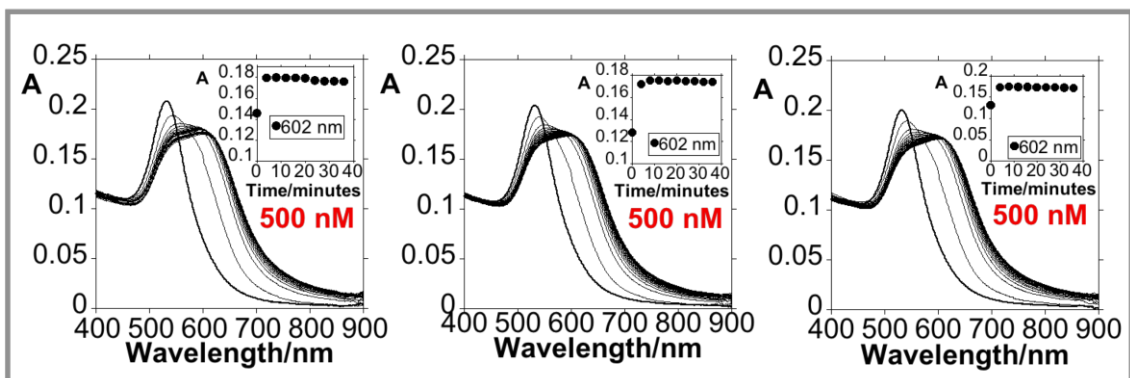

**Figure S6.** Three different replics of spectrophotometric titration of AuNPs@TC with the addition of 500 nM of  $\text{Al}(\text{NO}_3)_3$ .
